# Supplementary material
Source: publisher figshare collection journal article supplement (https://acs.figshare.com/ndownloader/files/3774574)
Supplement: Supplementary file 1 [file 3774574]

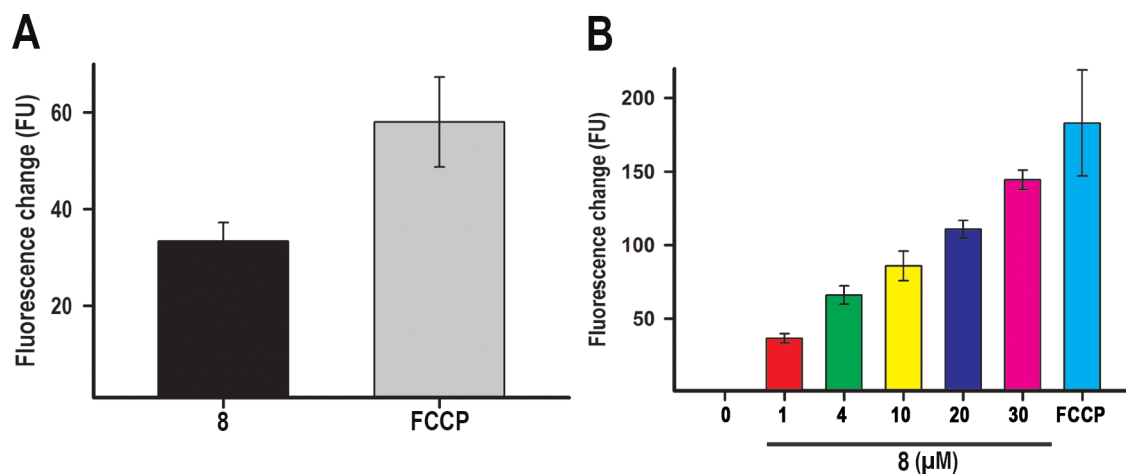

**Figure S1.** Uncoupling effect of **8**. (A) Changes in safranine fluorescence after additions of **8** (10  $\mu$ M) or FCCP (8  $\mu$ M), as shown in Figure 6A. (B) Changes in safranine fluorescence after addition of **8** (1-30  $\mu$ M) or FCCP (8  $\mu$ M), as shown in Figure 6D. The results are means  $\pm$  SD of three independent experiments.
